# Supplementary material
Source: PubMed Central journal article supplement (PMC5061338)
Supplement: NIHMS797031-supplement-1.pdf [file NIHMS797031-supplement-1.pdf]

**Supplementary Table 1. Competition ELISA<sup>1</sup>**

**Serum Specimen**

|                                             | <b>DV075</b>                                 | <b>DV092</b> | <b>SL088</b> | <b>13-B</b> | <b>25-B</b> | <b>DA005</b> | <b>DA023</b> | <b>DV097</b> |
|---------------------------------------------|----------------------------------------------|--------------|--------------|-------------|-------------|--------------|--------------|--------------|
| <b><u>Competing Antigen</u><sup>2</sup></b> | <b>Substrate: citHSP90<math>\beta</math></b> |              |              |             |             |              |              |              |
| <b>No Antigen</b>                           | 1                                            | 1            | 1            | 1           | 1           | 1            | 1            | 1            |
| <b>Peptide 7</b>                            | 0.97                                         | 0.91         | 0.89         | 1.14        | 0.98        | 1.02         | 0.73         | 0.86         |
| <b>Peptide 7C</b>                           | 0.82                                         | 1.02         | 0.66         | 1.11        | 0.57        | 0.41         | 0.38         | 0.62         |
|                                             | <b>Substrate: Peptide 7C</b>                 |              |              |             |             |              |              |              |
| <b>No Antigen</b>                           | 1                                            | 1            | 1            | 1           | 1           | NA           | NA           | NA           |
| <b>citHSP90<math>\beta</math></b>           | 0.59                                         | 1            | 0.79         | 0.66        | 0.76        | NA           | NA           | NA           |

<sup>1</sup>values equal ratio of OD<sub>450</sub>—pre-incubation with competing antigen/OD<sub>450</sub>--No Antigen pre-incubation.  
Collective data is representative of 3 independent experiments.

<sup>2</sup>competing antigen concentrations: peptides 7/7C=10  $\mu$ M, citHSP90 $\beta$ =0.1  $\mu$ M
